# Supplementary material
Source: PubMed Central journal article supplement (PMC4310808)

# Supporting Information

Figure S1. RMSD plot for a helical conformation of L25P (A) and a random-coil (B) in POPC bilayer.

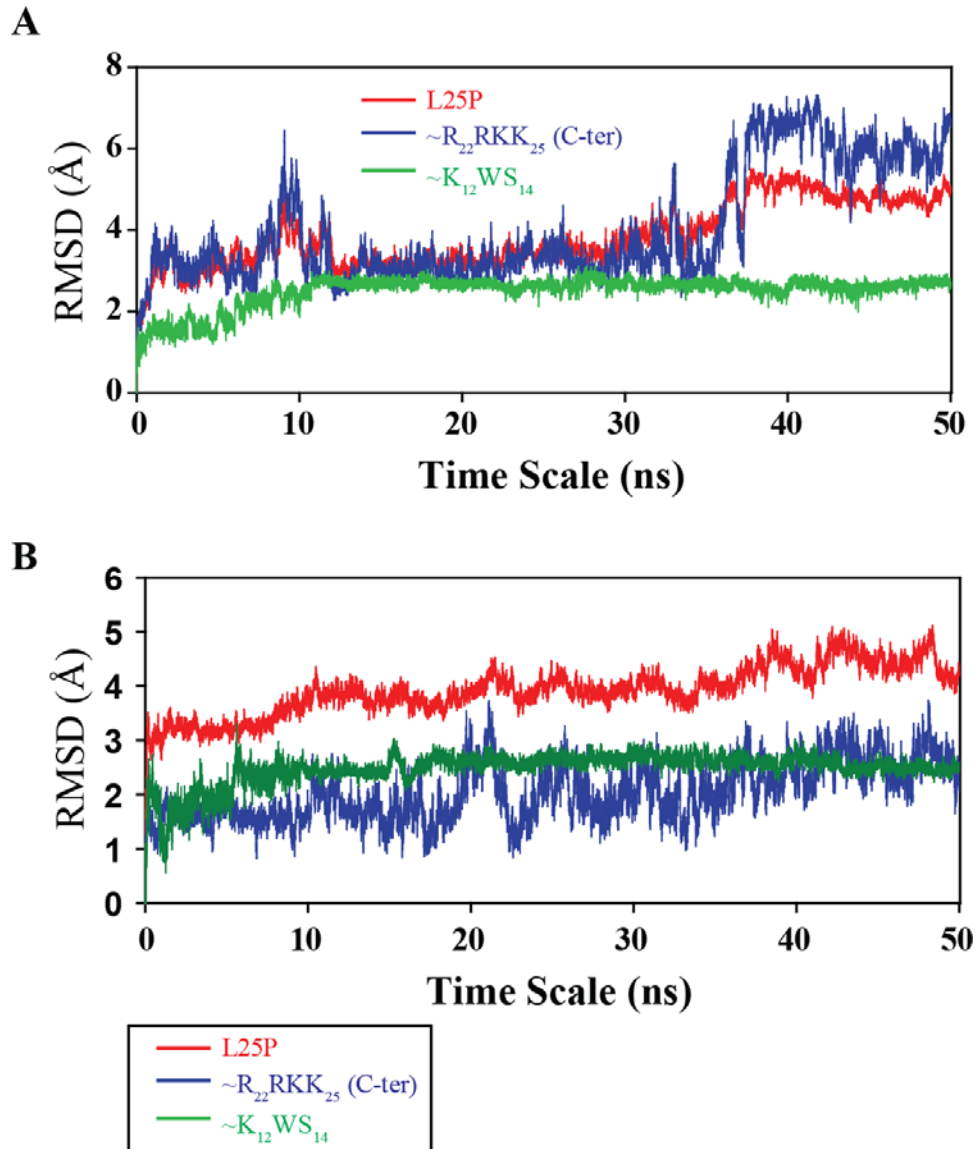

Supplement: NIHMS620089-supplement-01.pdf [file NIHMS620089-supplement-01.pdf]
